# Supplementary material for: Real-life glycaemic profiles in non-diabetic individuals with low fasting glucose and normal HbA1c: the A1C-Derived Average Glucose (ADAG) study
Source: PubMed Central journal article supplement — Diabetologia. 2010 Apr 16;53(8):1608–11. doi: 10.1007/s00125-010-1741-9 (PMC2892065; doi:10.1007/s00125-010-1741-9), 2010-04-16
Supplement: 125_2010_1741_MOESM1_ESM.pdf [file 125_2010_1741_MOESM1_ESM.pdf]

## **Electronic supplementary material**

### **The ADAG Study Group Members**

#### **Study centres**

##### **Amsterdam, the Netherlands:**

J. Kuenen (principle investigator [PI]), G.S.M.A. Kerner and A. van Iperen.

##### **Boston, MA, USA:**

E. Horton (PI), A. Cohen, S. Herzlinger-Botein and J. Paradis.

##### **Baltimore, MD, USA:**

C. Saudek (PI), K. Moore, A. Greene and M. Islas.

##### **Copenhagen, Denmark:**

J. Nerup (PI), R. Borg and C. Glümer.

##### **Padova, Italy:**

A. Mosca (co-PI), A. Lapolla (co-PI), D. Fedele and G. Sartore.

##### **New York, NY, USA:**

X. Pi-Sunyer (PI), C. Maggio, L. Haselman and C. Bellino.

##### **Rochester, MN, USA:**

S. Smith (PI), A. Reynolds, T. Robertson, H. Binner and K. Hurtis.

##### **San Antonio, TX, USA:**

S. Schwartz (PI), A. Ramos, A. Gonzales, A. Childress and Y. Martinez.

##### **Seattle, WA, USA:**

I. Hirsch (PI), D. Khakpour and C. Farricker.

##### **Yaoundé, Cameroon:**

J.C. Mbanya (PI), E. Sobngwi and E. Balti.

##### **Central laboratory, Zwolle, the Netherlands:**

R. Slingerland (PI), E. Lenters and H.P van Berkel.

##### **Biostatistics center, Boston, MA, USA:**

D. Schoenfeld (PI), H. Zheng, K. Pelak and R. Wilson.

##### **Coordinating center, Boston, MA, USA:**

D.M. Nathan (PI), N. Kingori and H. Turgeon.

##### **Study chairs:**

R.J. Heine and D.M. Nathan.
